# Supplementary material for: Dialdehyde Starch Nanocrystals as a Novel Cross-Linker for Biomaterials Able to Interact with Human Serum Proteins
Source: MDPI journal article supplement (doi:10.3390/ijms23147652), 2022-07-11
Supplement: s1 [file s1]

## **Dialdehyde starch nanocrystals as a novel cross-linker for biomaterials able to interaction with human serum proteins**

**Katarzyna Wegrzynowska-Drzymalska <sup>1</sup>, Kinga Mylkie <sup>1</sup>, Pawel Nowak <sup>1</sup>, Dariusz T. Mlynarczyk <sup>2</sup>, Dorota Chelminiak-Dudkiewicz <sup>1</sup>, Halina Kaczmarek <sup>1</sup>, Tomasz Goslinski <sup>2</sup>, and Marta Ziegler-Borowska <sup>1,\*</sup>**

<sup>1</sup> Department of Biomedical Chemistry and Polymer Science, Faculty of Chemistry, Nicolaus Copernicus University in Torun, Gagarina 7, 87-100 Torun, Poland; kasiawd@doktorant.umk.pl (K.W.-D.); kinga.mylkie@doktorant.umk.pl (K.M.); nowak19981411@wp.pl (P.N.); dorotachd@umk.pl (D.C.-D.); halina@umk.pl (H.K.)

<sup>2</sup> Chair and Department of Chemical Technology of Drugs, Poznan University of Medical Sciences, Grunwaldzka 6, 60-780 Poznan, Poland; mlynarczykd@ump.edu.pl (D.T.M.), tomasz.goslinski@ump.edu.pl (T.G.)

\* Correspondence: martaz@umk.pl (M.Z.-B.)

|                                                                                                                                                                                                                                                                                                            |   |
|------------------------------------------------------------------------------------------------------------------------------------------------------------------------------------------------------------------------------------------------------------------------------------------------------------|---|
| <b>Figure S1.</b> Images of all obtained samples. ....                                                                                                                                                                                                                                                     | 3 |
| <b>Table S1.</b> The average contact angle for glycerin and diiodomethane for films of chitosan (CS), gelatin (Gel), and chitosan-gelatin (CS-Gel) cross-linked by 5%, 10% and 15% adding of cross-linker (NDAS). ....                                                                                     | 4 |
| <b>Figure S2.</b> The TGA-DTG curves of (a) chitosan, (b) gelatin, and (c) chitosan-gelatin (1:1) cross-linked with 5%, 10%, and 15% of NDAS.....                                                                                                                                                          | 5 |
| <b>Figure S3.</b> AFM images in 2D scale of (a) chitosan films cross-linked by (d) 5% NDAS, (g) 10% NDAS, and (j) 15% NDAS, (b) gelatin film cross-linked by (e) 5% NDAS, (h) 10% NDAS, and (k) 15% NDAS, and (c) chitosan-gelatin films cross-linked by (f) 5% NDAS, (i) 10% NDAS, and (l) 15% NDAS. .... | 6 |
| <b>Table S2.</b> Amount of protein bound on the surface of biopolymers in mg of protein per 1 cm <sup>2</sup> of biopolymer film in the full range of incubation timescales.....                                                                                                                           | 7 |
| <b>Figure S4.</b> Emission fluorescence spectra of human serum albumin with increasing concentrations. ....                                                                                                                                                                                                | 8 |
| <b>Figure S5.</b> Emission fluorescence spectra of $\alpha$ 1-acid glycoprotein with increasing concentrations.                                                                                                                                                                                            | 9 |

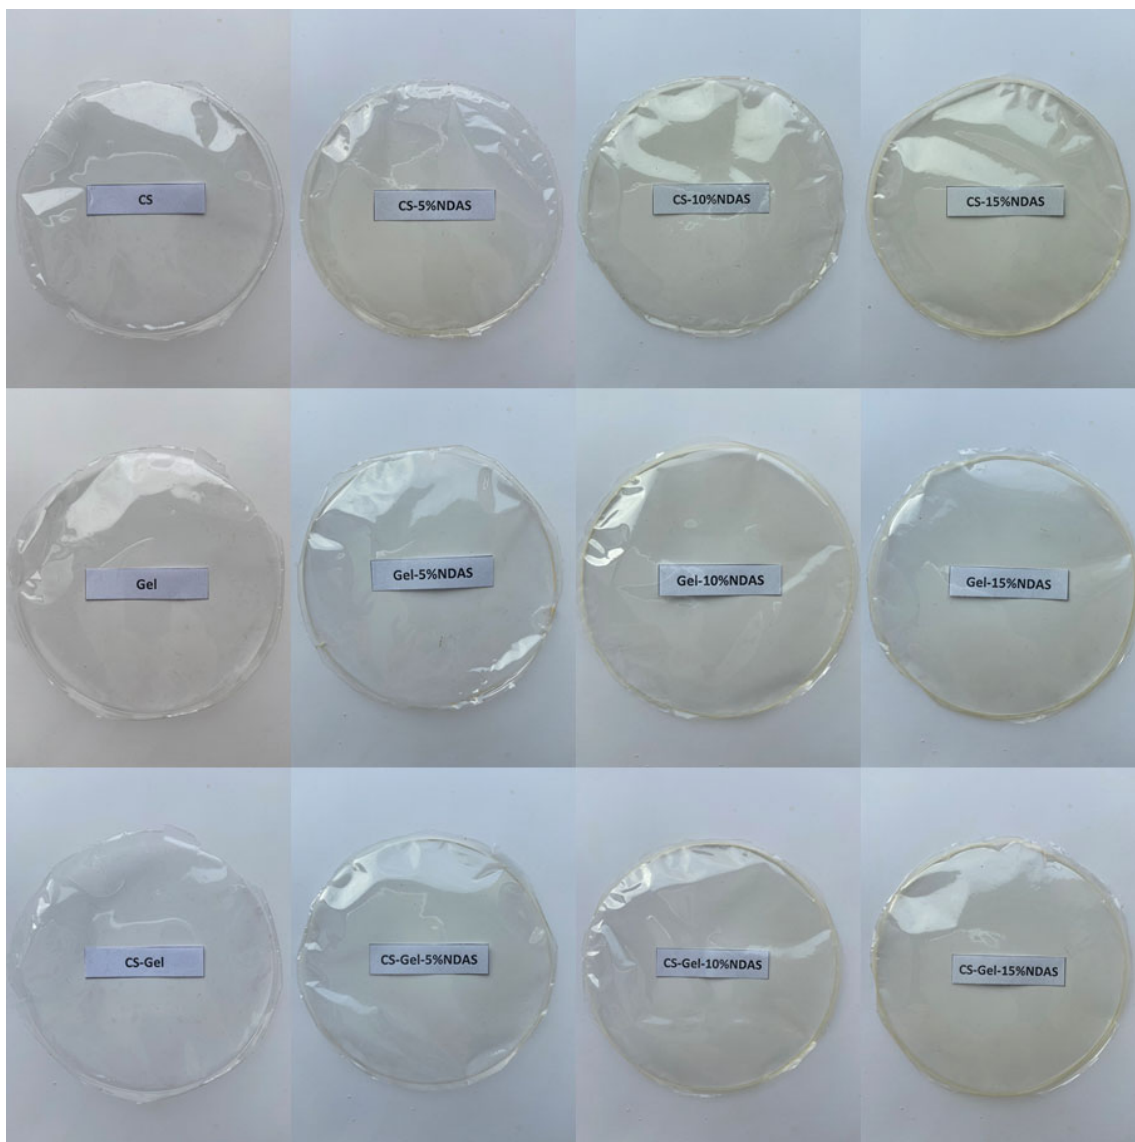

**Figure S1.** Images of all obtained samples.

**Table S1.** The average contact angle for glycerin and diiodomethane for films of chitosan (CS), gelatin (Gel), and chitosan-gelatin (CS-Gel) cross-linked by 5%, 10% and 15% adding of cross-linker (NDAS).

| Sample         | Average Contact Angle [ $\theta$ , $^{\circ}$ ] |               |
|----------------|-------------------------------------------------|---------------|
|                | Measuring Liquid                                |               |
|                | Glycerin                                        | Diiodomethane |
| CS             | 82.0                                            | 56.0          |
| CS-5%NDAS      | 79.4                                            | 55.7          |
| CS-10%NDAS     | 76.6                                            | 54.6          |
| CS-15%NDAS     | 76.1                                            | 49.0          |
| Gel            | 76.9                                            | 44.8          |
| Gel-5%NDAS     | 72.7                                            | 46.9          |
| Gel-10%NDAS    | 69.4                                            | 49.0          |
| CS-15%DAS      | 72.5                                            | 45.3          |
| CS-Gel         | 71.6                                            | 46.8          |
| CS-Gel-5%NDAS  | 75.2                                            | 49.7          |
| CS-Gel-10%NDAS | 72.7                                            | 48.0          |
| CS-15%Glu      | 74.4                                            | 46.2          |

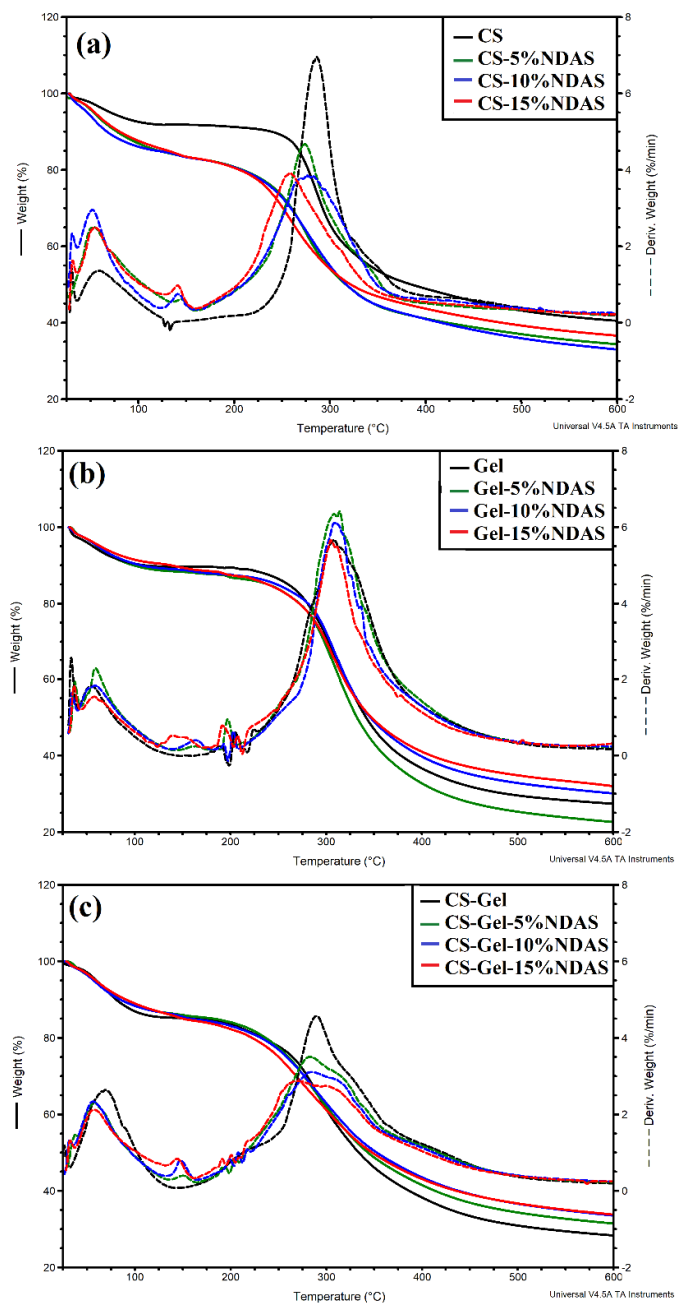

**Figure S2.** The TGA-DTG curves of (a) chitosan, (b) gelatin, and (c) chitosan-gelatin (1:1) cross-linked with 5%, 10%, and 15% of NDAS.

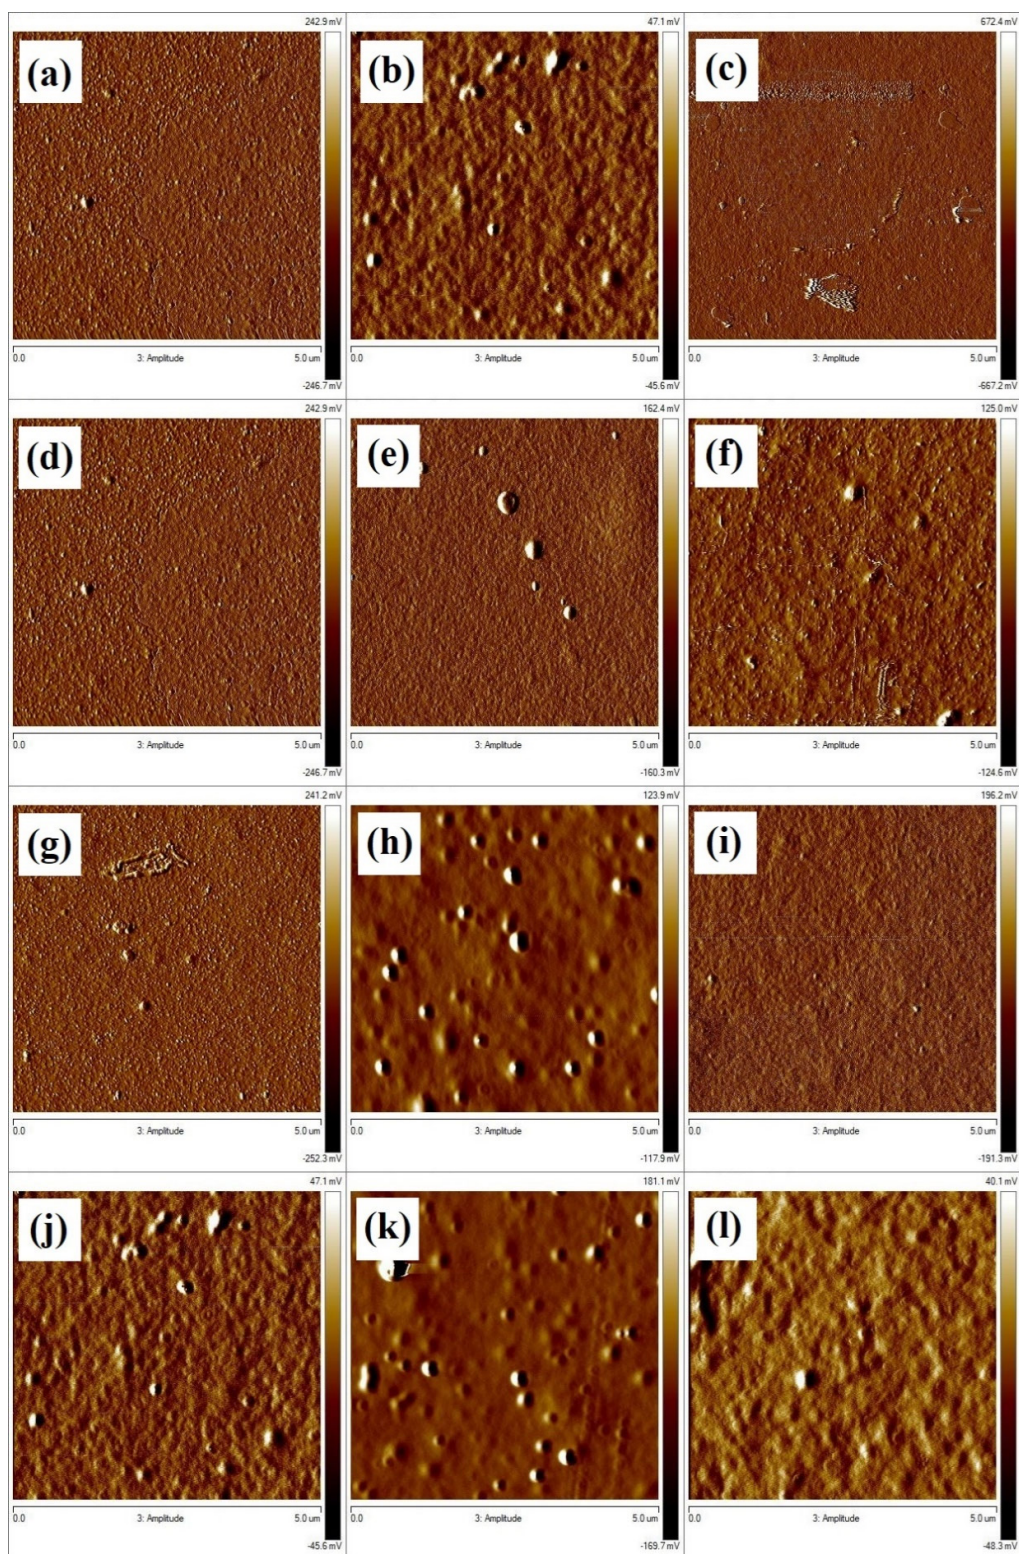

**Figure S3.** AFM images in 2D scale of (a) chitosan films cross-linked by (d) 5% NDAS, (g) 10% NDAS, and (j) 15% NDAS, (b) gelatin film cross-linked by (e) 5% NDAS, (h) 10% NDAS, and (k) 15% NDAS, and (c) chitosan-gelatin films cross-linked by (f) 5% NDAS, (i) 10% NDAS, and (l) 15% NDAS.

**Table S2.** Amount of protein bound on the surface of biopolymers in mg of protein per 1 cm<sup>2</sup> of biopolymer film in the full range of incubation timescales.

| Sample         | Incubation time [h]                                    |       |       |       |       |       |       |       |       |       |       |       |       |       |
|----------------|--------------------------------------------------------|-------|-------|-------|-------|-------|-------|-------|-------|-------|-------|-------|-------|-------|
|                | 1h                                                     |       | 2h    |       | 3h    |       | 4h    |       | 5h    |       | 6h    |       | 24h   |       |
|                | Amount of adsorbed serum protein [mg/cm <sup>2</sup> ] |       |       |       |       |       |       |       |       |       |       |       |       |       |
|                | HSA                                                    | AGP   | HSA   | AGP   | HSA   | AGP   | HSA   | AGP   | HSA   | AGP   | HSA   | AGP   | HSA   | AGP   |
| CS             | 0.067                                                  | 0.068 | 0.067 | 0.070 | 0.072 | 0.064 | 0.072 | 0.071 | 0.073 | 0.080 | 0.073 | 0.077 | 0.084 | 0.083 |
| CS-5%NDAS      | 0.116                                                  | 0.073 | 0.131 | 0.084 | 0.144 | 0.082 | 0.145 | 0.090 | 0.147 | 0.080 | 0.148 | 0.094 | 0.174 | 0.108 |
| CS-10%NDAS     | 0.093                                                  | 0.081 | 0.106 | 0.086 | 0.119 | 0.085 | 0.121 | 0.091 | 0.124 | 0.090 | 0.126 | 0.092 | 0.141 | 0.094 |
| CS-15%NDAS     | 0.159                                                  | 0.069 | 0.167 | 0.081 | 0.174 | 0.081 | 0.173 | 0.087 | 0.174 | 0.080 | 0.175 | 0.086 | 0.189 | 0.089 |
| Gel            | 0.094                                                  | 0.103 | 0.112 | 0.111 | 0.126 | 0.110 | 0.122 | 0.128 | 0.123 | 0.121 | 0.123 | 0.112 | 0.111 | 0.121 |
| Gel-5%NDAS     | 0.039                                                  | 0.117 | 0.042 | 0.129 | 0.044 | 0.130 | 0.045 | 0.140 | 0.045 | 0.148 | 0.047 | 0.147 | 0.051 | 0.170 |
| Gel-10%NDAS    | 0.036                                                  | 0.136 | 0.037 | 0.144 | 0.039 | 0.141 | 0.041 | 0.149 | 0.044 | 0.152 | 0.047 | 0.151 | 0.049 | 0.169 |
| Gel-15%NDAS    | 0.046                                                  | 0.255 | 0.065 | 0.256 | 0.069 | 0.256 | 0.071 | 0.258 | 0.072 | 0.259 | 0.072 | 0.258 | 0.074 | 0.266 |
| CS-Gel         | 0.031                                                  | 0.066 | 0.033 | 0.073 | 0.044 | 0.064 | 0.045 | 0.068 | 0.048 | 0.080 | 0.054 | 0.077 | 0.058 | 0.080 |
| CS-Gel-5%NDAS  | 0.042                                                  | 0.073 | 0.047 | 0.074 | 0.049 | 0.072 | 0.053 | 0.083 | 0.063 | 0.080 | 0.068 | 0.084 | 0.073 | 0.083 |
| CS-Gel-10%NDAS | 0.039                                                  | 0.065 | 0.040 | 0.067 | 0.041 | 0.070 | 0.044 | 0.077 | 0.047 | 0.073 | 0.051 | 0.076 | 0.051 | 0.077 |
| CS-Gel-15%NDAS | 0.052                                                  | 0.079 | 0.053 | 0.080 | 0.058 | 0.084 | 0.058 | 0.094 | 0.064 | 0.086 | 0.064 | 0.094 | 0.064 | 0.094 |

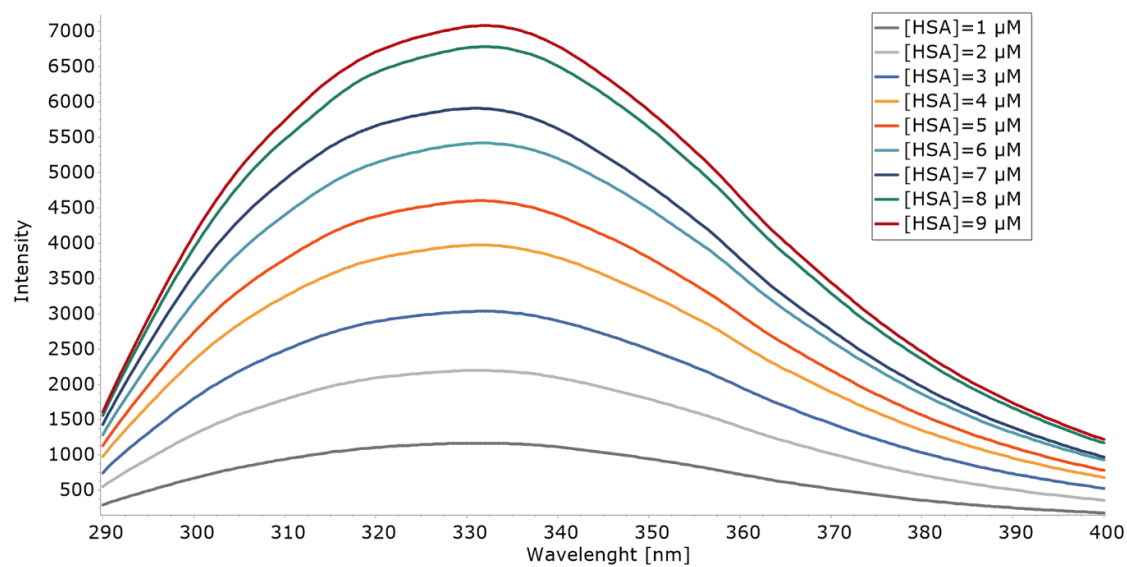

**Figure S4.** Emission fluorescence spectra of human serum albumin with increasing concentrations.

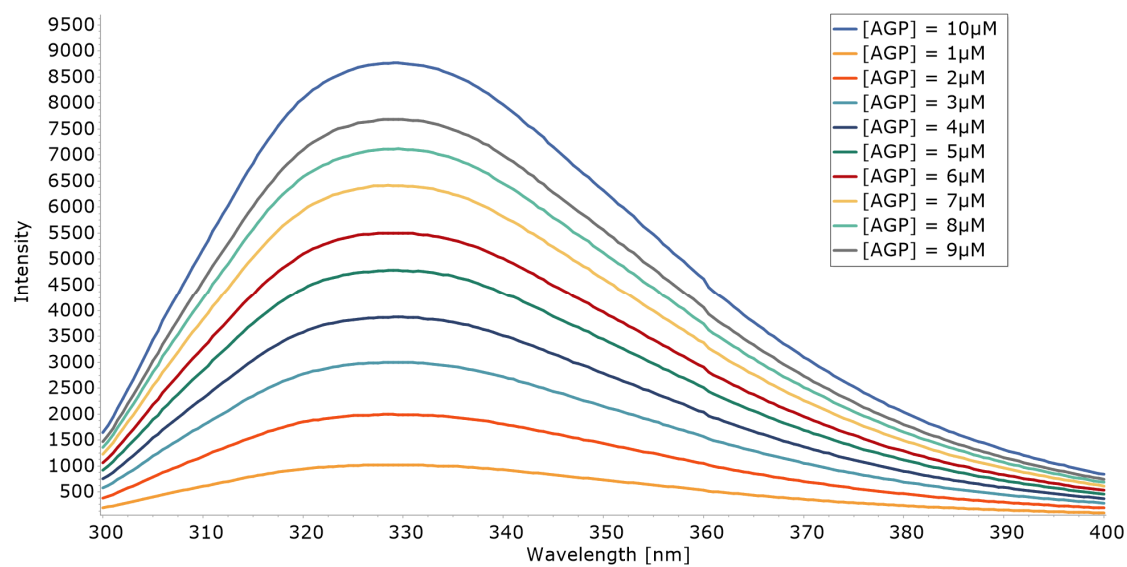

**Figure S5.** Emission fluorescence spectra of  $\alpha 1$ -acid glycoprotein with increasing concentrations.
